1 **Title:** A mechanistic path to maximize biomass productivity while maintaining diversity.

2

3 **Short title:** Species coexistence and ecosystem function

4

5 Oscar Godoy<sup>1\*</sup>, Lorena Gómez-Aparicio<sup>2</sup>, Luis Matías<sup>3</sup>, Ignacio M. Pérez-Ramos<sup>2</sup>, Eric Allan<sup>4</sup>.

6 <sup>1</sup> Departamento de Biología, Instituto Universitario de Investigación Marina (INMAR), Universidad de  
7 Cádiz, E-11510, Puerto Real, Spain.

8 <sup>2</sup> Instituto de Recursos Naturales y Agrobiología de Sevilla (IRNAS-CSIC), LINC-Global, Av. Reina  
9 Mercedes 10, E-41012, Sevilla, Spain.

10 <sup>3</sup> Departamento de Biología Vegetal y Ecología, Universidad de Sevilla, Av. Reina Mercedes, Sevilla, E-  
11 41080, Spain.

12 <sup>4</sup> Institute of Plant Sciences, University of Bern, Altenbergrain 21, 3013, Bern, Switzerland.

13 \* Corresponding author contact: [oscar.godoy@uca.es](mailto:oscar.godoy@uca.es), tel: (+34)956016018, Fax: (+34)956016019.

14

15 **Key words:** Coexistence, Community assembly, Diversity, Multifunctionality, Stability

16

## 17 **Author contributions**

18 OG, LGA and EA designed the study. OG, IMPR, and LM conducted field and lab work. OG analyzed the  
19 data. OG wrote the first draft of the manuscript and EA, LGA, IMPR, and LM contributed substantially to  
20 revisions.

21

22

23

24

25

26

27

28

29

## 30 **Abstract**

31 With ongoing biodiversity loss, it is important to understand how the mechanisms that promote  
32 coexistence relate to those that increase functioning in diverse communities. Both coexistence and  
33 biodiversity functioning research have unified their mechanisms into two classes. However, despite  
34 seeming similarities, theory suggests that coexistence and biodiversity mechanisms do not necessarily  
35 map onto each other, yet direct empirical evidence for this prediction is lacking. We coupled field-  
36 parameterized models of competition between 10 plants with a biodiversity-functioning experiment  
37 measuring biomass production, litter decomposition, and soil nutrient content under contrasting  
38 environmental conditions. We related biodiversity mechanisms (complementarity and selection effects), to  
39 coexistence mechanisms (niche and fitness differences). As predicted by theory, complementarity effects  
40 were positively correlated with niche differences and differences in selection effects were correlated with  
41 fitness differences. However, we also found that niche differences contributed to selection effects and  
42 fitness differences to complementarity effects. Despite this complexity more stably coexisting  
43 communities (i.e. those in which niche differences offset fitness differences) produced more biomass,  
44 particularly under drought. This relationship was weaker for litter decomposition rates and soil nutrient  
45 acquisition, showing that the mechanisms promoting plant coexistence may differ from those promoting  
46 high levels of functions that are less directly related to plant performance. We provide the first empirical  
47 evidence that the mechanisms promoting stable coexistence correlate with those driving high biomass  
48 production. These findings establish a link between stable coexistence and functioning, which could allow  
49 better predictions of how diversity loss induced by global change translates to changes in ecosystem  
50 function.

51

52

53

54

55

56

57

58

59

## 60 **Introduction**

61 A large number of experimental and observational studies have shown that more diverse communities  
62 tend to have higher levels of multiple ecosystem functions (1-5). At the same time, global change is  
63 reducing opportunities for coexistence (6-7), and therefore diversity (8), ultimately reducing a range of  
64 ecosystem functions and services (9). A better understanding of the mechanistic link between the  
65 processes maintaining biodiversity in communities and those driving functioning would allow us to better  
66 predict effects of global change on ecosystem functioning and to optimize restoration efforts. However,  
67 links between the conditions necessary for stable coexistence and the processes driving high functioning  
68 in diverse communities have remained elusive.

69 Coexistence and biodiversity-functioning theory have both developed frameworks unifying their principle  
70 mechanisms into two groups. Two main classes of mechanisms have been identified as underlying effects  
71 of biodiversity on function (10): complementarity effects occur when species, on average, yield more in  
72 mixture than in monoculture, and selection effects occur when there is a covariance (positive or negative)  
73 between monoculture yield and dominance in mixture. Similarly, modern coexistence theory (11) has  
74 successfully grouped coexistence mechanisms into: stabilizing processes which enhance niche differences,  
75 through increasing intraspecific competition relative to interspecific competition, and equalizing  
76 processes, where fitness differences that lead to competitive dominance are minimized. A first step  
77 towards combining biodiversity-functioning and coexistence theory would therefore be to show how these  
78 classes of mechanisms relate to each other. This would also clearly demonstrate how the causes of  
79 complementarity link to its effects, which has been a major source of confusion (12). There is a general  
80 assumption that niche differences, for instance in how species exploit resources, drive positive  
81 complementarity effects (10, 13-15) and therefore that strong complementarity between species should  
82 allow them to coexist. It is also tempting to assume that differences in fitness between species, i.e. in  
83 competitive dominance (11), produce selection effects. However, recent theoretical studies have shown  
84 that these mechanisms may not relate directly and that in fact positive complementarity effects can occur  
85 even without stabilizing niche differences (16-17). Thus, it is not clear to what extent biodiversity and  
86 coexistence mechanisms relate in practice. Surprisingly, while a huge number of studies have quantified  
87 selection and complementarity, no empirical studies have tried to link them explicitly to measured  
88 coexistence mechanisms.

89 Recent theory shows that the relationship between selection and complementarity effects and niche and

90 fitness differences can be more complicated than initially assumed (15, 18). The main reason is that  
91 selection and complementarity effects are determined by species' relative abundances and density  
92 dependent effects, and these emerge from the combination of niche and fitness differences between the  
93 species (19-21). Theoretical advances therefore suggest that we need to know what combination of niche  
94 and fitness differences maximize functioning. With larger niche differences promoting species evenness  
95 and smaller fitness differences reducing competitor dominance, our main hypothesis is that the  
96 communities with the highest functioning will be those in which the stabilizing effect of niche differences  
97 is sufficient to offset the fitness differences between species and therefore to allow them to stably coexist.  
98 Selection and complementarity effects have almost always been assessed for biomass production, but  
99 other critical ecosystem functions may show different responses to biodiversity (1). We therefore also aim  
100 to test whether the conditions promoting stable coexistence also promote high levels of functions other  
101 than biomass production such as litter decomposition or soil nutrient cycling.

102 To rigorously evaluate the relationships between biodiversity-functioning and coexistence mechanisms,  
103 we performed a combined competition and biodiversity functioning experiment with 10 annual plant  
104 species (Table 1) in a Mediterranean grassland. We field-parameterized population models to quantify  
105 stabilizing niche differences and average fitness differences. Then, we related these pairwise species  
106 differences to observed complementarity and selection effects for biomass, litter decomposition and soil  
107 nutrient variation. Prior experimental and observational work has shown that environmental variation  
108 modulates the net effect of diversity on productivity (22, 23), which is consistent with theoretical  
109 expectations (24). To further evaluate the role of environmental variation, we directly manipulated the  
110 timing of species germination to create two contrasting scenarios of water availability (control climate and  
111 drought treatments; see the section "Methods" for more details). This manipulation modified the niche and  
112 fitness differences between species pairs (7) and allowed us to test for the strength of the correlation  
113 between niche and fitness differences and complementarity and selection effects in different  
114 environments.

## 115 **Results**

116 We first analyzed the overall relationship between diversity and function and found that more diverse  
117 communities produced more biomass, their litter decomposed faster and showed lower soil N than less  
118 diverse communities, although the magnitude of these relationships depended on the climatic conditions  
119 (Fig. 1). These positive diversity effects mostly resulted from an increase in complementarity effects with

120 increasing community diversity. In contrast, selection effects became more negative with increasing  
121 diversity (*SI Appendix*, Fig. S1).

122 We next related biodiversity-functioning to coexistence mechanisms. Niche and fitness differences are  
123 defined for pairs of species (15) in the annual plant model (see eq. 2 and 3, material and methods), but  
124 complementarity and selection effects are commonly measured at the community level (10). To compare  
125 the effects, we therefore selected techniques (diversity interaction models (25)) that allowed us to  
126 calculate complementarity between pairs of species and selection effects for individual species, which we  
127 converted to pairwise differences in selection effects. When averaged at the community level, these  
128 selection and complementarity effects were similar to those obtained from the additive partition of Loreau  
129 & Hector (10) (*SI Appendix*, Fig. S2). For all functions evaluated, pairwise complementarity effects were  
130 higher when stabilizing niche differences were large and when average fitness differences were small. In  
131 contrast, pairwise differences in selection effects were larger when niche differences were small and  
132 fitness differences were large (Fig. 2). Although the direction of effects was consistent across functions,  
133 their significance varied and complementarity effects were sometimes only weakly linked to niche  
134 differences (Fig. 2). Surprisingly, these relationships across functions were in general stronger under  
135 drought conditions, despite the fact that the drought treatment significantly reduced both niche and fitness  
136 differences (7) (*SI Appendix*, Fig. S3).

137 Fitness differences between species can result from differences in demography (i.e. differences in intrinsic  
138 growth rates) or in species responses to competition (see material and methods, eq. 3). In order to  
139 investigate the importance of these two components, we correlated each one with complementarity and  
140 selection and found that they did not contribute equally to observed complementarity and selection effects.  
141 Complementarity effects only correlated significantly with the competitive response ratio, not the  
142 demographic ratio, and only under the control climate (Fig. 2). This suggests that asymmetries in species'  
143 sensitivity to competition, rather than differences in growth rate, reduced complementarity effects between  
144 them. In contrast, both demographic and competitive response differences were correlated with  
145 differences in species' selection effects. Demographic differences correlated with differences in selection  
146 effects on biomass (control climate) and soil nitrogen content (drought) and competitive response  
147 differences correlated with differences in selection effects for soil nitrogen content and litter  
148 decomposition under drought (Fig. 2). Importantly, the relationships observed for soil N were the same for

149 the other soil elements analyzed, namely total organic carbon, available P, and exchange cations (*SI*  
150 *Appendix*, Fig. S4).

151

152 Both stabilizing niche differences and average fitness differences influenced multiple ecosystem  
153 functions. We therefore evaluated their combined effect on functioning, i.e. whether species pairs  
154 predicted to more stably coexist have higher functioning. Supporting our main hypothesis, we found that  
155 the species pairs predicted to coexist more stably, i.e. those in which observed niche differences were  
156 larger than the minimum required to offset fitness differences, were in turn predicted to produce  
157 significantly more biomass under both climatic conditions. However, they were not predicted to have  
158 higher levels of the other functions, i.e. litter decomposition or soil resource use (Fig. 3).

159

160 To estimate the long-term stability of our experimental communities, we used the empirically estimated  
161 vital rates and interaction coefficients for all species pairs to build a competitive network. Diverse  
162 communities are locally stable only if all of the species can coexist despite perturbations to their  
163 population size at equilibrium. We did predict feasible and locally stable equilibrium for several species'  
164 pairs and one triplet although not for any of the experimental assembled communities, under the two  
165 climatic conditions (*SI Appendix*, Fig. S5). This result suggests that observed levels of the ecosystem  
166 functions were transient rather than stable.

167

## 168 **Discussion**

169 Understanding connections between the factors that promote species coexistence and high ecosystem  
170 functioning would allow a better mechanistic understanding of how biodiversity loss translates to  
171 reductions in ecosystem function. Both fields have developed frameworks to unify mechanisms but  
172 theoretical attempts to link the frameworks have shown that they cannot be easily mapped onto each other.  
173 However, by combining recent advances in coexistence theory with a series of competition and  
174 biodiversity functioning experiments, we could show that the two frameworks can be linked and that  
175 positive effects of biodiversity on functioning resulted from a combination of niche differences stabilizing  
176 coexistence, and average fitness differences driving competitive exclusion. Moreover, our results provide  
177 a clear link between the conditions for stable coexistence and high functioning by showing that biomass  
178 production is maximized when species coexist more stably, i.e. when niche differences exceed more  
179 strongly fitness differences.

180

181 According to the classic expectations, we provide empirical support for the assumption that niche  
182 differences drive complementarity, while competitive ability differences drive selection effects. However,  
183 our results also support recent theoretical suggestions (15-18) that both selection and complementarity  
184 effects include a combination of niche and fitness differences (Fig. 2). We generally find larger  
185 complementarity effects when species differ in their niches and larger differences in selection effects  
186 when species differ substantially in fitness. Depending on the function and environment, differences in  
187 selection effects could be driven either by differences in species intrinsic growth rates or differences in  
188 their response to competition. These results imply that communities should lead to functioning being  
189 driven by a smaller number of species when they  
190 contain species that vary more in growth rate, (e.g. differences among species in resource conservation  
191 versus acquisition) (26), or factors that enhance differences in competitive ability, such as high nutrient  
192 addition (27).

193

194 Complementarity effects were promoted by niche differences but were also reduced when species differed  
195 strongly in fitness, more specifically, if they differed in their response to competition. In addition,  
196 differences in selection effects between species were reduced when they differed strongly in their niches.  
197 The negative effects of fitness differences on complementarity, and the negative effects of niche  
198 differences on differences in selection effects likely arise because both niche and fitness differences are  
199 density dependent effects involving the same model parameters (see equations 2 and 3). This means that  
200 two interrelated processes should occur at the same time to increase function. First, fitting with the classic  
201 expectation, species should differ in their niches, but second and much less intuitive, species should have  
202 similar sensitivities to competition. Therefore, factors such as nutrient additions or loss of consumers that  
203 reduce niche differences or enhance differences in competitive ability are expected to reduce  
204 complementarity effects and to lead to a greater imbalance in species functional effects.

205

206 Given this more complex relationship between the determinants of coexistence and the mechanisms  
207 promoting positive effects of biodiversity on functioning, we also conducted an integrated analysis to  
208 determine if those communities where coexistence was most stable had highest functioning. In support of  
209 our main hypothesis, we found that more stable pairs (i.e. those in which their niche differences exceed  
210 more strongly their fitness differences) were predicted to produce more biomass (Fig. 3). Theory (15-18)

211 shows that complementarity effects can arise even in the absence of stable coexistence; however, our  
212 empirical approach shows that this may be quite rare and that high biomass production is only likely in  
213 communities that can stably coexist. This is an important result because it provides a clear link between  
214 the conditions for stable coexistence and ecosystem functioning and therefore, a direct pathway to achieve  
215 the desired objective of maximizing functioning while maintaining biodiversity.

216

217 Although they were productive, more stably coexisting plant communities did not show faster litter  
218 decomposition rates or more soil nutrient uptake (Fig. 3). In addition, complementarity effects on litter  
219 were not explained by any of the coexistence mechanisms. These results suggest that the conditions  
220 leading to more stable coexistence of plant species maximize functions directly related to plant  
221 performance, such as biomass production, but have weaker effects on functions which are less directly  
222 related. A potential explanation of these mismatches is that these functions more strongly involve the  
223 effect of other trophic levels. For instance, litter decomposition is influenced not only by leaf litter traits,  
224 but also by the effect of soil organisms, including macro- and micro-invertebrates, nematodes, bacteria,  
225 and fungi (28). In addition, the combinations of plant traits that lead to high litter decomposition, or soil  
226 nutrient uptake, may be different to those determining stable coexistence. These results show that linking  
227 coexistence and functioning is likely to be more complex for functions other than biomass. To understand  
228 how diversity loss affects these functions we may need to consider the mechanisms promoting coexistence  
229 not only of plants but of multiple trophic levels (29).

230

231 Analyses based on single-stable equilibrium predicted that none of our experimental communities could  
232 coexist at the scale of the experiment (Table 1). This is not a surprising result since we could not include  
233 the spatial and temporal variations key to maintain diversity at larger scales (30), only coexistence  
234 mechanisms that operate in constant environments can contribute to the niche differences we measured  
235 (11). Nevertheless, we do find a significant link between stable coexistence and biomass production,  
236 which suggests that non-spatial/temporal coexistence mechanisms such as resource partitioning or natural  
237 enemies do promote high biomass production in this system. Evaluating how much function coexistence  
238 mechanisms operating in variable environments add to the system is definitely a promising direction for  
239 further research.

240



241 Environmental conditions affected the strength of relationships between coexistence and biodiversity  
242 mechanisms. In our study, delaying germination decreased rainfall by almost 40% and reduced the  
243 growing season by two months. This delay strongly reduced biomass production to about 10% of the level  
244 in control conditions (Fig. 1), consistent with the predominant role of water availability in controlling  
245 biomass yields in Mediterranean ecosystems (e.g. 31). This reduction in water availability might be  
246 expected to reduce available niches and competitive ability differences and we did find evidence that  
247 wetter environmental conditions allowed for greater niche and fitness differences between species pairs  
248 (*SI Appendix*, Fig. S3) (7). With greater niche overlap, it is reasonable to expect a weaker relationship  
249 between stabilizing niche differences and complementarity, however, we actually observed a stronger  
250 correlation between them (Fig. 2). This implies that not all of the processes driving niche differences  
251 contributed to complementarity effects under wet conditions (Fig. 2). Our approach is phenomenological,  
252 which means that we do not know the specific sources of variation in observed niche differences in our  
253 experiment. Overall, these results emphasize the context-dependency of biodiversity effects on  
254 functioning, and call for a framework to understand what type of environmental conditions are promoting  
255 the niche differences that contribute to complementarity effects.

256

257 Our study represents a step forward in evaluating the link between the drivers maintaining diversity and  
258 functioning compared to previous experimental work that considered particular components (e.g.  
259 interspecific facilitation, (32)) or aggregates (e.g. community evenness (33)) of niche and fitness  
260 differences. Still our approach to measure stability, either that of species pairs or of equilibrium  
261 communities, is fundamentally based on pairwise interactions between species. The next step is to move  
262 beyond this pairwise framework to one in which niche and fitness differences are estimated at the  
263 community-level, and in which additional factors determining coexistence at the multispecies level such  
264 as indirect or “higher order” interactions are incorporated (34). Although recent toolboxes have been  
265 proposed to adopt this new framework (35), we lack clear expectations about how the mechanisms  
266 determining the degree of stability in complex communities are linked to the net effect of biodiversity on  
267 functioning. However, incorporating these effects would be important to test if the communities providing  
268 high levels of functions like litter decomposition are in fact able to stably coexist. Multispecies  
269 interactions may be more important for explaining other functions or functioning in other contexts but our  
270 results suggest that, for biomass production at least, the degree of stability in coexistence predicted by the  
271 pairwise approach works well to explain functioning.

272

273 Here, we provide the first empirical evidence that niche differences do indeed drive complementarity  
274 effects. However, consistent with recent theoretical advances (15, 18), we found that both selection and  
275 complementarity are related to a combination of the stabilizing niche differences that promote species  
276 diversity and to the average fitness differences that promote competitive exclusion. Despite these complex  
277 relationships, when integrating the conditions for coexistence, we found that more stable coexistence  
278 promotes higher biomass production. This implies that any process that destabilize coexistence should  
279 therefore reduce ecosystem functioning. However, extending these findings to functions beyond biomass  
280 is more complex. Overall, our results suggest that we need to develop a framework to link the species  
281 differences allowing more stable coexistence to those promoting high levels of different functions. This  
282 would involve expanding our perspective to multitrophic communities and perhaps to indirect and higher  
283 order interactions. We also need to complement the phenomenological approaches used here with more  
284 detailed consideration of underlying mechanisms. Our results provide a first step in this direction by  
285 showing that the conditions promoting stable coexistence and high ecosystem functioning are the same.

286

## 287 **Material and Methods**

### 288 *Study site and experimental setup*

289 Our experiment was conducted at the *La Hampa* field station of the Spanish National Research Council  
290 (CSIC) in Seville, Spain (37°16'58.8"N, 6°03'58.4"W), 72 m above sea level. The climate is  
291 Mediterranean, with mild, wet winters and hot, dry summers. Soils are loamy with pH = 7.74, C/N = 8.70  
292 and organic matter = 1.16% (0-10 cm depth). Precipitation totaled 532 mm during the experiment  
293 (September 2014-August 2015), similar to the 50-y average. We used ten common annual plants, which  
294 naturally co-occur at the study site, for the experiment. These species cover a wide phylogenetic and  
295 functional range and include members of six of the most abundant families in the Mediterranean  
296 grasslands of southern Spain (Table 1). Seeds were provided by a local supplier (Semillas silvestres S.L.)  
297 from populations located near to our study site. Our experiments were located within an 800 m<sup>2</sup> area,  
298 which had been previously cleared of all vegetation and which was fenced to prevent mammal herbivory.  
299 Landscape fabric was placed between plots to prevent growth of weeds.

300

### 301 *Theoretical background for quantifying niche and fitness differences*

302 Here we summarize the approach developed in (36) to quantify the stabilizing effect of niche differences  
 303 and average fitness differences between any pair of species. Both these measures are derived from  
 304 mathematical models that capture the dynamics of competing annual plant populations with a seed bank  
 305 (21, 37). This approach has been used in the past to accurately predict competitive outcomes between  
 306 annual plant species (36). Population growth is described as:

307

$$309 \quad \frac{N_{i,t+1}}{N_{i,t}} = (1 - g_i)s_i + \frac{\lambda_i g_i}{1 + \alpha_{ii} g_i N_{i,t} + \sum_{j=1}^S \alpha_{ij} g_j N_{j,t}}$$

308 (1)

310 where  $\frac{N_{i,t+1}}{N_{i,t}}$  is the per capita population growth rate, and  $N_{i,t}$  is the number of individuals (seeds) of  
 311 species  $i$  before germination in the fall of year  $t$ . Changes in per capita growth rates depend on the sum of  
 312 two terms. The first describes the proportion of seeds that do not germinate ( $1 - g_i$ ) but survive in the  
 313 seed soil bank ( $s_i$ ). The second term describes how much the per germinant fecundity, in the absence of  
 314 competition ( $\lambda_i$ ), is reduced by the germinated density of conspecific ( $g_i N_{i,t}$ ) and various heterospecific  
 315 ( $\sum_{j=1}^S g_j N_{j,t}$ ) neighbors. These neighbor densities are modified by the interaction coefficients describing  
 316 the per capita effect of species  $j$  on species  $i$  ( $\alpha_{ij}$ ) and species  $i$  on itself ( $\alpha_{ii}$ ).

317

318 Following earlier studies (11, 36), we define niche differences ( $1 - \rho$ ) for this model of population  
 319 dynamics between competing species as:

$$320 \quad 1 - \rho = 1 - \sqrt{\frac{\alpha_{ij} \alpha_{ji}}{\alpha_{jj} \alpha_{ii}}}$$

321 (2)

322 The stabilizing niche differences reflect the degree to which intraspecific competition exceeds  
 323 interspecific competition.  $1 - \rho$  is 1 when individuals only compete with conspecifics (i.e. there is no  
 324 interspecific competition) and it is 0 when individuals compete equally with conspecifics and  
 325 heterospecifics (i.e. intra and interspecific competition are equal). Niche differences between plant species  
 326 can arise for instance from differences in light harvesting strategies (36, 38), or in soil resource use and  
 327 shared mutualisms (39).

328

329 The average fitness differences between a pair of competitors is  $\frac{\kappa_j}{\kappa_i}$  (36), and its expression is the  
 330 following:

331 
$$\frac{\kappa_j}{\kappa_i} = \frac{\eta_j - 1}{\eta_i - 1} \sqrt{\frac{\alpha_{ij} \alpha_{ii}}{\alpha_{ji} \alpha_{jj}}}$$

332 (3)

333 The species with the higher value of  $\frac{\kappa_j}{\kappa_i}$  (either species  $i$  or species  $j$ ) is the competitive dominant, and in  
334 the absence of niche differences excludes the inferior competitor. This expression shows that  $\frac{\kappa_j}{\kappa_i}$  combines  
335 two fitness components, the “demographic ratio” ( $\frac{\eta_j - 1}{\eta_i - 1}$ ) and the “competitive response ratio” ( $\sqrt{\frac{\alpha_{ij} \alpha_{ii}}{\alpha_{ji} \alpha_{jj}}}$ ).

336 The demographic ratio is a density independent term and describes the degree to which species  $j$  has  
337 higher annual seed production, per seed lost from the seed bank due to death or germination, than species  
338  $i$ :

339 
$$\eta_j = \frac{\lambda_j g_j}{1 - (1 - g_j) s_j}$$

340 The competitive response ratio is a density dependent term, which describes the degree to which species  $i$   
341 is more sensitive to both intra and interspecific competition than species  $j$ . Note that the same interaction  
342 coefficients defining niche differences are also involved in describing the competitive response ratio,  
343 although their arrangement is different.

344

345 With niche differences stabilizing coexistence and average fitness differences promoting competitive  
346 exclusion, the condition for coexistence (mutual invasibility) is expressed as (11, 36):

347

348 
$$\rho < \frac{\kappa_j}{\kappa_i} < \frac{1}{\rho}$$

349 (4)

350 This condition shows that species with large differences in fitness need to also have high niche differences  
351 to coexist. In contrast, species with similar fitness can coexist even with small niche differences. As a  
352 consequence, the mutual invasibility criterion allows us to quantify the degree to which a pair of species  
353 can stably coexist. Species pairs whose niche differences are much larger than the minimum required to  
354 overcome the fitness differences between them will be more stable than species pairs whose niche  
355 differences are close to the minimum. Species pairs whose niche differences are smaller than the  
356 minimum needed to overcome fitness differences will be unstable. We used this condition to relate the  
357 degree of stability to productivity (see below *analyses* section).

358

359 *Field parameterization of population models under two contrasting climatic conditions*

360 We conducted a field experiment to parameterize these models with estimates of species germination  
361 fractions, seed survival in the soil and per germinant fecundities in the absence of neighbors. We also  
362 estimated all pairwise interaction coefficients between the species by growing each species in competition  
363 with itself and with all other species, in experimental plant communities in which we manipulated  
364 competitor density and identity, following previous experimental designs (20). Specifically, we  
365 established 180 rectangular plots (0.65 m × 0.5 m) in September 2014 prior to the major autumn rains. We  
366 randomly assigned each of 80 plots to be sown with one of the 10 species at a density of 2, 4, 8, or 16  
367 g/m<sup>2</sup> of viable seed, giving two replicates per density and per species. Each plot was divided into 20  
368 subplots (a four row by five column array) with a buffer of 2 cm along the edge of the plot. At the center  
369 of each subplot, we sowed five viable seeds of one of the 10 species, and germinants were thinned to a  
370 single individual per subplot. This design allowed us to measure viable seed production on two focal  
371 individuals per species and plot, when competing with different number of neighbors of the same species  
372 and each of the other 9 species. We additionally established 10 plots that had the same array but did not  
373 include any density treatment in order to measure viable seed production of focal individuals of the 10  
374 species in the absence of competition. Information from both plots with and without density treatments  
375 were combined to estimate per germinant seed production in the absence of neighbors ( $\lambda_i$ ) and the  
376 interaction coefficients ( $\alpha_{ij}$ ) according to the function (20).

377 
$$F_i = \frac{\lambda_i}{1 + \sum_j \alpha_{ij} N_{j,t}}$$

378 To fit this function, we used maximum likelihood approaches (optim method="L-BFGS-B") to ensure that  
379  $\lambda_i$  and  $\alpha_{ij} \geq 0$ . For each target species  $i$ , we fit a separate model jointly evaluating its response to  
380 individuals of all other species and itself. This approach fits a single per germinant fecundity in the  
381 absence of competition,  $\lambda_i$  for each species  $i$ . To estimate species' germination fraction ( $g_i$ ), we counted  
382 the number of germinants in at least one plot of each density and divided by the total number of seeds  
383 originally sown. To obtain the seed bank survival ( $s_i$ ), we followed the method detailed in (36), burying 5  
384 replicates of 100 seeds each on the surrounding area from September 2014 to August 2015 and  
385 determining their viability as described in (7). Finally, we repeated the same experiment with the  
386 remaining 90 plots, sowing seeds on 10<sup>th</sup> December 2014 to simulate a drier climate. We selected this type  
387 of treatment because annual species germination occurs only after major autumn rains and, in

388 Mediterranean ecosystems, delays in the start of the rainy season strongly affect annual plant population  
389 dynamics (40). This delay of 64 days resulted in changes in daylight, temperature, and rainfall between  
390 treatments. However, most notably, it produced a 38.7% reduction in precipitation (from 532 in the first  
391 experiment to 326 mm for this second experiment).

392

### 393 *A biodiversity-functioning experiment with multiple functions*

394 We conducted a biodiversity-functioning experiment to simultaneously estimate complementarity and  
395 selection effects for three different functions: biomass production, litter decomposition, and changes in  
396 soil nutrient content. We established 104 circular plots ( $0.75\text{m}^2$ ) in the same area and at the same times as  
397 the competition experiment. We randomly assigned each plot to be a monoculture or a mixture of 3, 5, 7,  
398 9 and 10 species. All plots were sown at a total seed density of  $15\text{g}/\text{m}^2$ , and seed mass was evenly divided  
399 between the species in mixtures. To create the mixtures, we randomly assembled 6 different communities  
400 of 3 species, 4 communities of 5 species, 3 communities of 7 species, and 2 communities of 9 species.  
401 These communities, as well as the 10 monocultures and the one 10 species mixture, were all replicated  
402 twice within each climatic condition (i.e. climate control and drought). We visually assessed the biomass  
403 of each plot biweekly, and collected aboveground biomass when it was maximal in each plot. We defined  
404 the peak of biomass as the first date when a majority of species were senescent. At this time, all species  
405 had produced flowers. Biomass was separated by species, air dried for two weeks, then oven dried at 60  
406 °C during 3 days and weighed (g).

407

408 In addition, we conducted biweekly surveys of leaf senescence within species to estimate when to put  
409 litter bags in the soil. We defined the peak of leaf senescence as the date when the number of individuals  
410 with clear senescence symptoms (several leaves dropped from the individuals) outnumbered those  
411 without. Litter bags initially contained between 0.35 and 1.5 g of leaf litter material from a single species,  
412 which was collected from individuals of the same plot where we placed the bags. This procedure ensures  
413 that litter quality and litter decomposition rates are driven by the species characteristic and by the specific  
414 competitive, soil, and microenvironmental conditions of each plot. We separated litter bags for each of the  
415 species included in the plot. This might underestimate litter mixing effects but the alternative, a single  
416 litter bag with mixed litter, would not have allowed us to distinguish the identity of decomposed litter and  
417 therefore to estimate decomposition rates at the species level. After three months, litter bags were

418 harvested, carefully brushed clean, dried at 60 °C during 3 days, and weighed to calculate the percentage  
419 of litter mass loss.

420

421 We assessed soil nutrient dynamics as changes in C, N, P, and K, Ca, Mg cations right before (September  
422 2014) and after the experiment (September 2015), in the first 10 cm of soil. This corresponds to the soil  
423 depth influenced by annual plant vegetation in Mediterranean ecosystems and contains 95% of the total  
424 community root biomass (41). For chemical analyses, soils were dried in the lab at 30°C until constant  
425 weight, and sieved (2mm) to eliminate stones and large roots. Soils were analyzed for total organic C (%)  
426 (Walkley-Black method (42)), total organic N (%) (Kjeldahl method (43)), available P (mg/kg) (Olsen  
427 method (44)), and exchange cations (mg/kg) ( $\text{Ca}^{2+}$ ,  $\text{Mg}^{2+}$ ,  $\text{K}^{+}$ , extracted with 1M ammonium acetate and  
428 determined by atomic absorption).

429

#### 430 *Analyses*

431 We first explored the relationships between species diversity and biomass production, litter decomposition  
432 and nutrient content at the end of the experiment. We tested for linear and non-linear saturating  
433 relationships for the three types of functions.

434

435 Then, we tested for correlations between complementarity/selection effects and niche/fitness differences,  
436 under the two climatic conditions and for the three functions considered. Because niche and fitness  
437 differences are defined as pairwise measures, we could not use the standard additive partitioning approach  
438 to calculate them (10) and instead we used diversity interaction models (25) to calculate complementarity  
439 between pairs of species and selection effects for individual species. These models estimate selection  
440 effects as the ability of species to dominate each function regardless of its initial abundance because  
441 possess particular traits such as high leaf N or high photosynthetic rates. On the other hand,  
442 complementarity occurs when species yield more function in mixture than in monoculture because for  
443 instance they partition resource use. In order to convert selection effects to a pairwise measure we  
444 calculated the ratio between selection effects for pairs of species. We used the ratio rather than a  
445 difference because fitness differences are also defined as a ratio between species fitnesses (see equation  
446 3). We then checked whether the selection and complementarity effects from the diversity interaction  
447 models (25) correlated with those produced by the additive partition of Loreau and Hector (10). In order to  
448 do this, we summed the individual (selection), or pairwise (complementarity) values from the diversity

449 interaction models across all species in each community. These values correlated reasonably well with the  
450 values from the additive partitioning (r-values ranging between 0.487-0.769; *SI Appendix*, Fig. S2).  
451  
452 We used Mantel tests, and the Benjamini and Hochberg correction for multiple comparisons, to test for  
453 significant correlations between coexistence (niche and fitness differences, equations 2 and 3) and  
454 biodiversity functioning mechanisms (complementarity and selection effects). In addition to analysing the  
455 overall fitness differences we also split them into their two components, the demographic ratio and the  
456 response to competition ratio, and correlated each component with complementarity and selection effects.  
457 The same Mantel test procedure was also used to test for the correlation between the stability of species  
458 pairs (difference between the observed niche difference and the minimum niche difference needed to  
459 allow coexistence) and the degree of function predicted for that pair. We used our diversity interaction  
460 models to estimate the degree of functioning predicted for each species pair.  
461  
462 Finally, we combined field-parameterized models of competition among 10 annual plant species with  
463 tools from network theory to analyze whether there are feasible and locally stable equilibrium for any of  
464 the 32 experimentally assembled communities. More specifically, we first used an algebra matrix  
465 inversion approach (45) to compute species abundances at a single stable equilibrium for these  
466 combinations of 3, 5, 7, 9, and 10 species. Because species abundance at equilibrium can be positive or  
467 negative, this means that a stable equilibrium might not contain all species from the original community  
468 pool. Therefore, we estimated which of the stable species assemblages, were also feasible, i.e.  
469 assemblages with positive abundances of all members at equilibrium, by deriving the Jacobian matrix for  
470 the annual plant model, and assessing whether the maximal eigenvalue of the Jacobian was less than one,  
471 in absolute terms (46). This network analysis was used to predict whether the observed levels of the  
472 different ecosystem functions were likely to be stable over time, or transient, based on which species were  
473 expected to go extinct. All analyses were conducted in R Version. 3.5.3 (47).

474

## 475 **Acknowledgements**

476 We thank Eduardo Gutierrez and Juan S. Cara for conducting soil nutrient analyses and lab guidance. O.  
477 G. acknowledges postdoctoral financial support provided by the European Union Horizon 2020 research  
478 and innovation program under the Marie Skłodowska-Curie grant agreement No 661118-BioFUNC.

479



## 481 References

- 482 1. S. Soliveres, *et al.*, Biodiversity at multiple trophic levels is needed for ecosystem  
483 multifunctionality. *Nature* **536**, 456-459 (2016).
- 484 2. F.T. Maestre, *et al.*, Plant species richness and ecosystem multifunctionality in global drylands.  
485 *Science* **335**, 214-218 (2012).
- 486 3. E.S. Zavaleta, J. R.Pasari, K. B. Hulvey, D. Tilman, Sustaining multiple ecosystem functions in  
487 grassland communities requires higher biodiversity. *Proc. Natl. Acad. Sci. U.S.A* **107**, 1443-1446  
488 (2010).
- 489 4. O. Hoegh-Guldberg, *et al.*, Coral reefs under rapid climate change and ocean acidification. *Science*  
490 **318**, 1737-1742 (2007).
- 491 5. B. Worm, *et al.*, Impacts of biodiversity loss on ocean ecosystem services. *Science* **314**, 787-790  
492 (2006).
- 493 6. P. B. Adler, H. J. Dalglish, S. P. Ellner, Forecasting plant community impacts of climate variability  
494 and change: when do competitive interactions matter? *J. Ecol.*, **100**, 478-487 (2012).
- 495 7. L. Matias, O. Godoy, L. Gómez-Aparicio, I. M. Pérez-Ramos, An experimental extreme drought  
496 reduces the likelihood of species to coexist despite increasing intransitivity in competitive  
497 networks. *J. Ecol.* **106**, 826-837 (2018).
- 498 8. T. Newbold, *et al.*, Global effects of land use on local terrestrial biodiversity. *Nature* **520**, 45 (2015).
- 499 9. E. Allan, *et al.*, Land use intensification alters ecosystem multifunctionality via loss of biodiversity  
500 and changes to functional composition. *Ecol. Lett.*, **18**, 834-843 (2015).
- 501 10. M. Loreau, A. Hector, Partitioning selection and complementarity in biodiversity experiments.  
502 *Nature* **412**, 72-76 (2001).
- 503 11. P. Chesson, Mechanisms of maintenance of species diversity. *Annu. Rev. Ecol. Syst.* **31**, 343-366  
504 (2000).
- 505 12. K. E. Barry *et al.*, The future of complementarity: disentangling causes from consequences. *Trends*  
506 *Ecol. Evol.* **34**, 167-180 (2018).
- 507 13. J. W. Fox, The long-term relationship between plant diversity and total plant biomass depends on  
508 the mechanism maintaining diversity. *Oikos* **102**, 630-640 (2003).
- 509 14. D. Tilman, C. L. Lehman, K. T. Thomson, Plant diversity and ecosystem productivity: theoretical  
510 considerations. *Proc. Natl. Acad. Sci. U.S.A* **94**, 1857-1861 (1997).
- 511 15. L. A. Turnbull, J. M. Levine, M. Loreau M, A. Hector, Coexistence, niches and biodiversity effects on  
512 ecosystem functioning. *Ecol. Lett.* **16**, 116-127 (2013).
- 513 16. L. A. Turnbull, F. Isbell, D.W. Purves, M. Loreau M, A. Hector, Understanding the value of plant  
514 diversity for ecosystem functioning through niche theory. *Proc. R. Soc. B* **20160536**. (2016)
- 515 17. P. J. Vermeulen, J. Ruijven, N. P. R. Anten, W. Werf, A. Satake, An evolutionary game theoretical  
516 model shows the limitations of the additive partitioning method for interpreting biodiversity  
517 experiments. *J. Ecol.* **105**, 345-353 (2017).
- 518 18. I. T. Carroll, B. J. Cardinale, R. M. Nisbet, Niche and fitness differences relate the maintenance of  
519 diversity to ecosystem function. *Ecology* **92**, 1157-1165 (2011).
- 520 19. H. Maherali, J. N. Klironomos, Influence of phylogeny on fungal community assembly and  
521 ecosystem functioning. *Science* **316**, 1746-1748 (2007).
- 522 20. O. Godoy, N. J. B. Kraft, J. M. Levine, Phylogenetic relatedness and the determinants of competitive  
523 outcomes. *Ecol. Lett.* **17**, 836-844 (2014).
- 524 21. J. M. Levine, J. HilleRisLambers, The importance of niches for the maintenance of species diversity.  
525 *Nature* **461**, 254-257(2009).
- 526 22. D. Craven, *et al.*, Plant diversity effects on grassland productivity are robust to both nutrient  
527 enrichment and drought. *Phil. Trans. R. Soc. B* **371**, 20150277 (2016).
- 528 23. N. R. Guerrero-Ramírez, *et al.*, Diversity-dependent temporal divergence of ecosystem functioning  
529 in experimental ecosystems. *Nature Ecol. Evol.* **1**, 1639 (2017).
- 530 24. F. Isbell, *et al.*, Quantifying effects of biodiversity on ecosystem functioning across times and  
531 places. *Ecol. Lett.* **21**, 763-778 (2018).
- 532 25. J. Connolly *et al.*, An improved model to predict the effects of changing biodiversity levels on  
533 ecosystem function. *J. Ecol.* **101**, 344-355 (2013).
- 534 26. I. J. Wright *et al.*, The worldwide leaf economics spectrum. *Nature* **428**, 6985 (2004).
- 535 27. N. DeMalach, E. Zaady, R. Kadmon, Light asymmetry explains the effect of nutrient enrichment on  
536 grassland diversity. *Ecol. Lett.* **20**, 60-69 (2017).
- 537 28. S. Hättenschwiler, A.V. Tiunov, S. Scheu, Biodiversity and litter decomposition in terrestrial  
538 ecosystems. *Annu. Rev. Ecol. Evol. Syst.* **36**, 191-218 (2005).

- 539 29. O. Godoy, I. Bartomeus, R. Rohr, S. Saavedra, Towards the integration of niche and network  
540 theories *Trends Ecol. Evol* **33** 287-300 (2018).
- 541 30. U. Brose, H. Hillebrand, Biodiversity and ecosystem functioning in dynamic landscapes. *Proc. R.*  
542 *Soc. B* **371** (2016).
- 543 31. I. M. Pérez-Ramos, *et al.*, Climate variability and community stability in Mediterranean shrublands:  
544 the role of functional diversity and soil environment. *J. Ecol.* **105**, 1335-1346 (2017).
- 545 32. B. J. Cardinale, M. A. Palmer, S. L. Collins, Species diversity enhances ecosystem functioning through  
546 interspecific facilitation. *Nature* **415**, 426-429 (2002).
- 547 33. L. Wittebolle, *et al.*, Initial community evenness favours functionality under selective stress. *Nature*  
548 **458**, 623-626 (2009).
- 549 34. J. M. Levine, J. Bascompte, P. B. Adler, S. Allesina, Beyond pairwise mechanisms of species  
550 coexistence in complex communities. *Nature* **546**, 56-64 (2017).
- 551 35. S. Saavedra, *et al.*, A structural approach for understanding multispecies coexistence. *Ecol. Monogr.*  
552 **87**, 470-486 (2017).
- 553 36. O. Godoy, J. M. Levine, Phenology effects on invasion success: insights from coupling field  
554 experiments to coexistence theory. *Ecology* **95**, 726-736 (2014).
- 555 37. P. L. Chesson, Geometry, Heterogeneity and Competition in Variable Environments. *Proc. R. Soc. B*  
556 **330**, 165-173 (1990)
- 557 38. I. M. Pérez-Ramos, *et al.*, Functional traits and phenotypic plasticity modulates species coexistence  
558 across climatic conditions. *Nat. Comm.* **10**, 2555 (2018).
- 559 39. J. B. Lanuza, I. Bartomeus, O. Godoy, Opposing effects of floral visitors and soil conditions on the  
560 determinants of competitive outcomes maintain species diversity in heterogeneous landscapes.  
561 *Ecol. Lett.* **21**, 865-874 (2018).
- 562 40. J. M. Levine, A. K. McEachern AK, C. Cowan, Seasonal timing of first rain storms affects rare plant  
563 population dynamics. *Ecology* **92**, 2236-2247 (2011).
- 564 41. M. Rueda, S. Rebollo, M. A. Rodríguez, Habitat productivity influences root mass vertical  
565 distribution in grazed Mediterranean ecosystems. *Acta Oecologica* **36**, 377-382 (2010).
- 566 42. A. Walkley, I. A. Black, An examination of the Degtjareff method for determining soil organic  
567 matter, and a proposed modification of the chromic acid titration method. *Soil Science* **37**, 29-38.  
568 (1934)
- 569 43. J. Bremner, D. R. Keeney, Steam distillation methods for determination of ammonium, nitrate and  
570 nitrite. *Analytica chimica acta* **32**, 485-495 (1965).
- 571 44. S. R. Olsen, Estimation of available phosphorus in soils by extraction with sodium bicarbonate  
572 (USDA; Washington) (1954).
- 573 45. P. Yodzis, The indeterminacy of ecological interactions as perceived through perturbation  
574 experiments. *Ecology* **69**, 508-515 (1988).
- 575 46. O. Godoy, D. B. Stouffer, N. J. B. Kraft, J. M. Levine, Intransitivity is infrequent and fails to promote  
576 annual plant coexistence without pairwise niche differences. *Ecology* **98**, 1193-1200 (2017).
- 577 47. R Development Core Team R: A language and environment for statistical computing (R Foundation  
578 for Statistical Computing, Vienna, Austria), 3.5.3. (2019).

**Table 1** Species and assembled communities with the diversity levels used in the experiment.

| Species                       | Family       | Code | Community  | Composition                                                     |
|-------------------------------|--------------|------|------------|-----------------------------------------------------------------|
| <i>Bromus madritensis</i>     | Poaceae      | BRMA | 3 species  | 1 (BRMA, BOOF, MACA), 2 (BOOF, CABU, MEPO),                     |
| <i>Borago officinalis</i>     | Boraginaceae | BOOF |            | 3 (CAAR, PARO, VISA), 4 (BRMA, CABU, MEPO),                     |
| <i>Calendula arvensis</i>     | Asteraceae   | CAAR | 5 species  | 5 (CABU, DIER, MACA), 6 (BRMA, DIER, SIAL).                     |
| <i>Capsela bursa-pastoris</i> | Brassicaceae | CABU |            | 1 (BRMA, CAAR, CABU, DIER, MEPO),                               |
| <i>Diploaxis eruroides</i>    | Brassicaceae | DIER | 7 species  | 2 (BOOF, CAAR, DIER, PARO, VISA),                               |
| <i>Matricaria chamomilla</i>  | Asteraceae   | MACA |            | 3 (BOOF, CABU, DIER, PARO, VISA),                               |
| <i>Medicago polymorpha</i>    | Fabaceae     | MEPO | 9 species  | 4 (BRMA, BOOF, MACA, MEPO, VISA).                               |
| <i>Papaver rhoeas</i>         | Papaveraceae | PARO |            | 1 (BRMA, CABU, DIER, MEPO, SIAL, PARO, VISA),                   |
| <i>Sinapis alba</i>           | Brassicaceae | SIAL | 10 species | 2 (BRMA, CAAR, MACA, MEPO, PARO, SIAL, VISA),                   |
| <i>Vicia sativa</i>           | Fabaceae     | VISA |            | 3 (BRMA, BOOF, CAAR, CABU, DIER, MACA, PARO).                   |
|                               |              |      |            | 1 (BRMA, BOOF, CAAR, DIER, MACA, MEPO, PARO, SIAL, VISA),       |
|                               |              |      |            | 2 (BRMA, CAAR, CABU, DIER, MACA, MEPO, PARO, SIAL, VISA).       |
|                               |              |      |            | 1 (BRMA, BOOF, CAAR, CABU, DIER, MACA, MEPO, PARO, SIAL, VISA). |

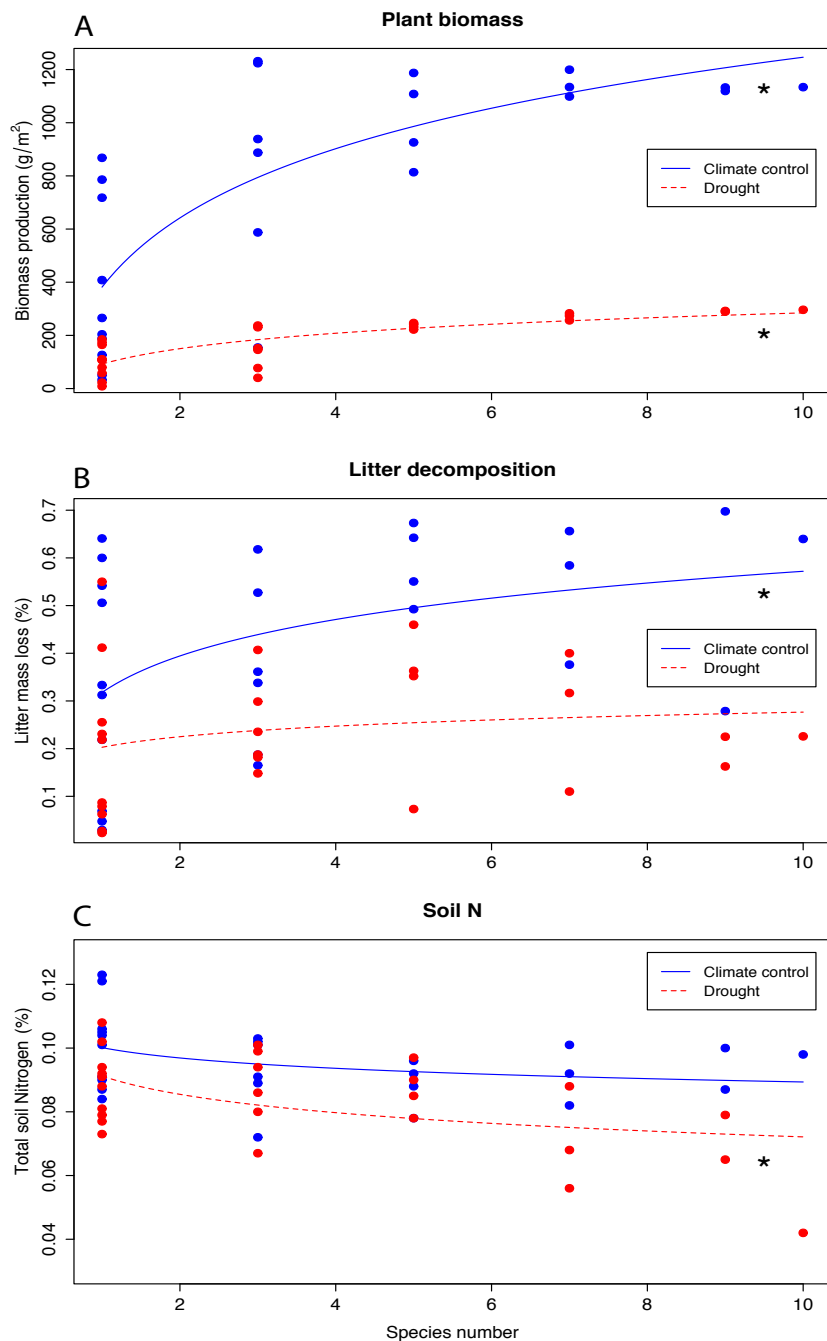

**Fig. 1.** Observed effects of species diversity on biomass production, litter decomposition and soil nutrient availability. Total Soil N is shown here as an example of soil nutrient content but very similar relationships were observed for the other soil elements measured (C, P, Ca, Mg, and K). Blue lines and points represent the communities under control climate conditions and red dashed lines and points show the same communities under drought conditions. Non-linear instead regressions fitted the data better. Significant regressions at  $P < 0.05$  are represented with an asterisk.

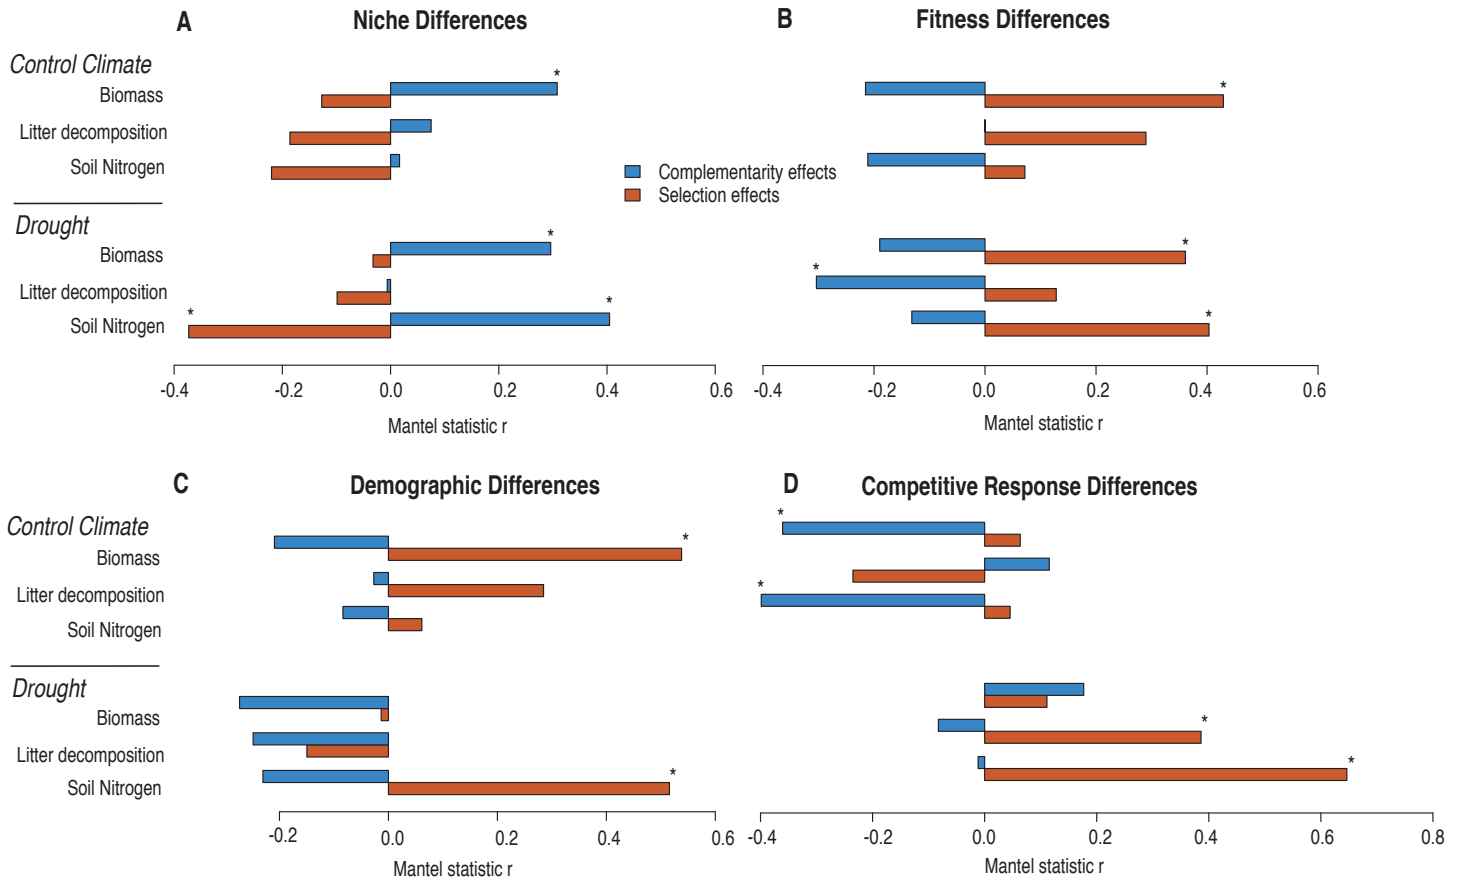

**Fig. 2.** Correlations between (A) stabilizing niche and (B) average fitness differences and complementarity (blue) and selection effects (red). Correlations are shown for the three functions considered, under the two contrasting environmental conditions (control climate, drought). Correlations between complementarity and selection are also shown with the two components of fitness differences, the demographic ratio (C) and the competitive response ratio (D). Significant correlations, following Benjamini-Hochberg correction for multiple comparisons, are marked with an asterisk.

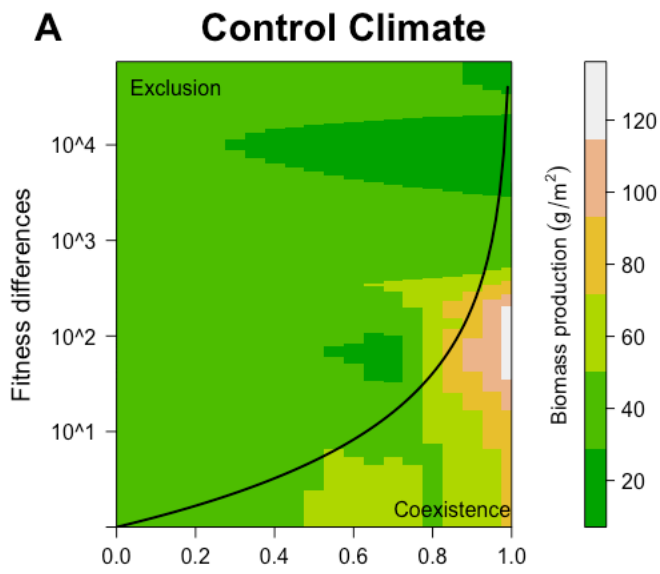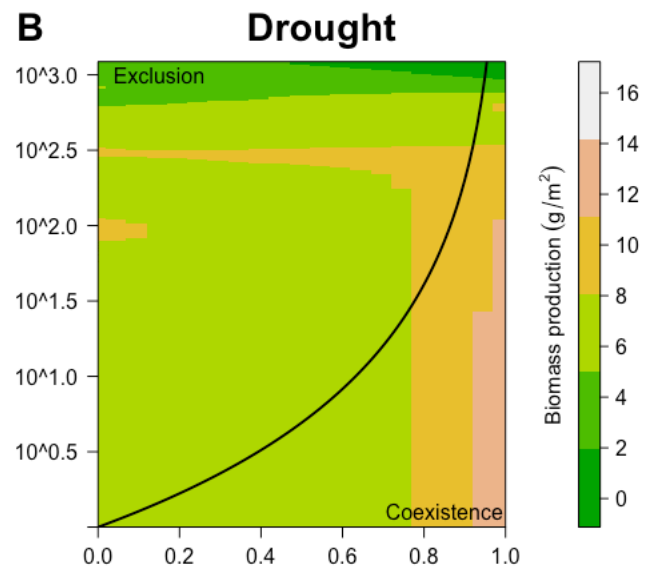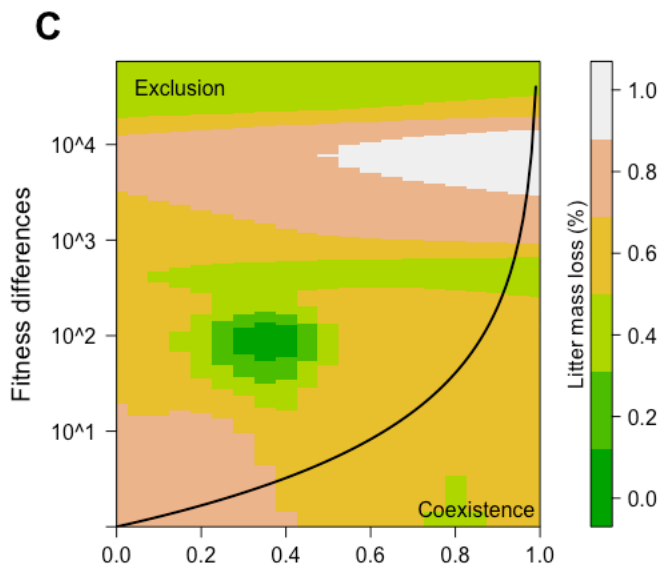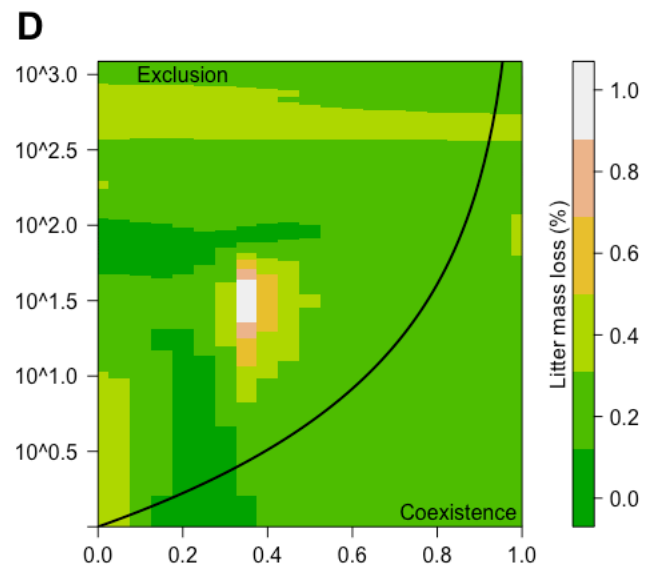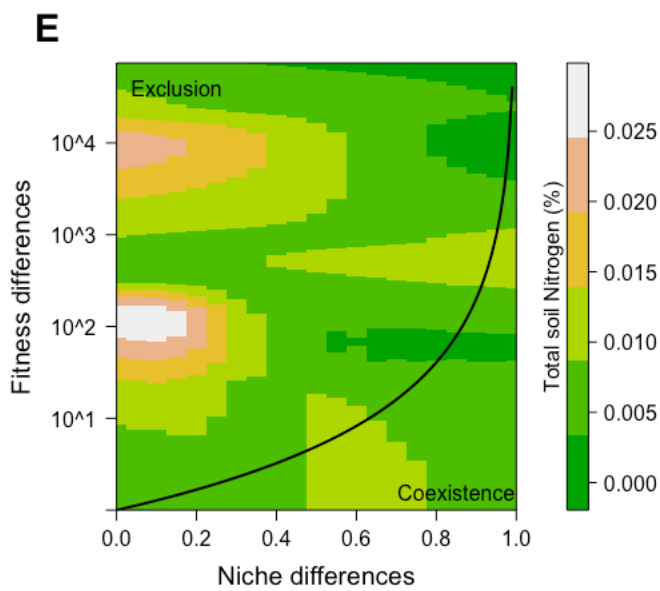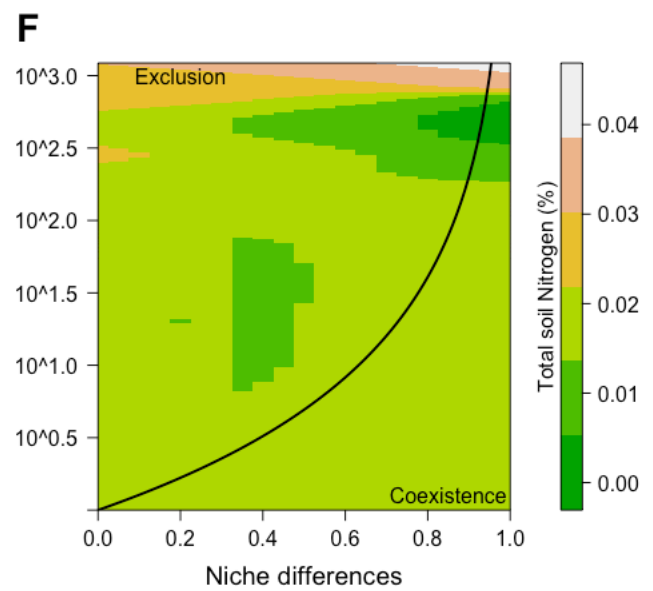

**Fig. 3.** Relationship between the degree of stability of coexistence and the levels of multiple functions (biomass, upper two panels; litter decomposition, middle two panels; total soil N, lower two panels) under control climate conditions (left panels), and drought (right panels). The heat map represents the level of functioning estimated for a given species pairs, using the approach of (30) . Greener colors represent low functioning while brownish to white colors represent higher functioning. The solid black line indicates whether the conditions for coexistence are met ( $\rho < \frac{\kappa_j}{\kappa_i}$ , where species  $j$  is the fitness superior) and separates the coexistence from the competitive exclusion region. Mantel tests, following Benjamini-Hochberg correction for multiple comparisons, showed that species pair stability (i.e. their distance from the coexistence line) was significantly related to their predicted biomass production (Control conditions Mantel  $r = 0.38$ ,  $P = 0.048$ ; Drought Mantel  $r = 0.43$ ,  $P = 0.018$  ) but not to the predicted litter decomposition (Control conditions Mantel  $r = 0.14$ ,  $P = 0.359$  ; Drought Mantel  $r = - 0.26$ ,  $P = 0.850$ ) or soil nitrogen availability (Control conditions Mantel  $r = - 0.32$ ,  $P = 0.909$ ; Drought Mantel  $r = -0.16$ ,  $P = 0.788$  ). For a graphical representation of observed pairwise niche and fitness differences, see *SI Appendix*, Fig. S3.

## Supplementary material

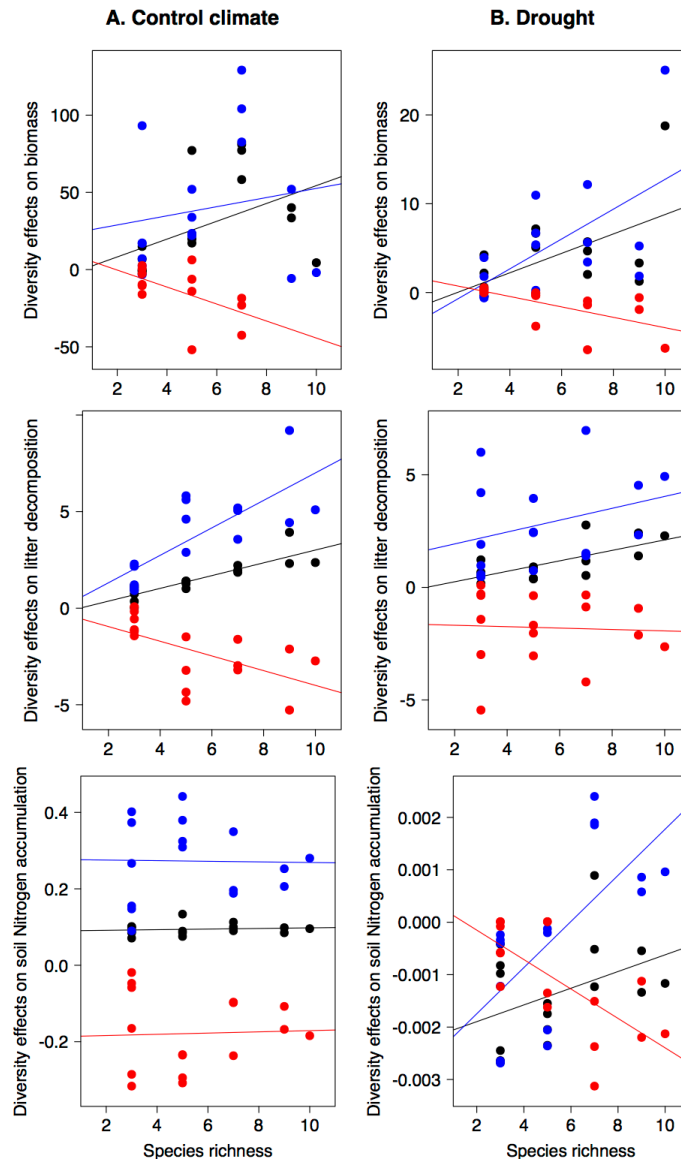

**Fig. S1** Net biodiversity effects (black line) and its two components (complementarity (blue line) and selection effects (red line)) as a function of species richness across the three functions considered (biomass production, litter decomposition, and soil nutrient accumulation) under the two contrasted climatic conditions (A) Control climate and (B) Drought. Species richness was a significant predictor ( $p < 0.05$ ) of the net effect of biodiversity on productivity for all functions except for litter decomposition under drought conditions and soil nitrogen under control climate. For soil nutrients, we represent the particular case of nitrogen but very similar relationships were observed for the other elements considered.



**Biomass Control climate  
Selection effects**

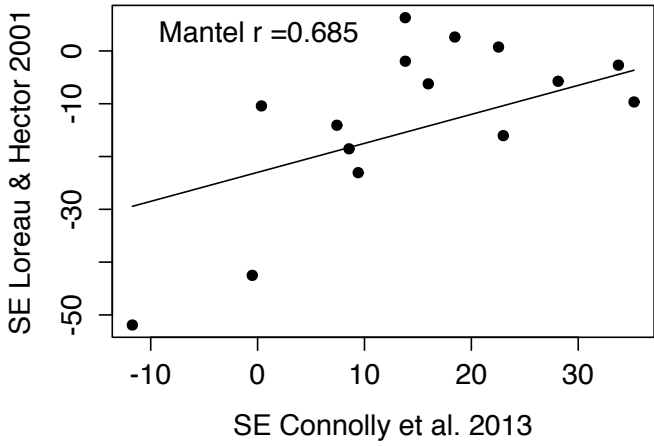

**Biomass Control climate  
Complementarity effects**

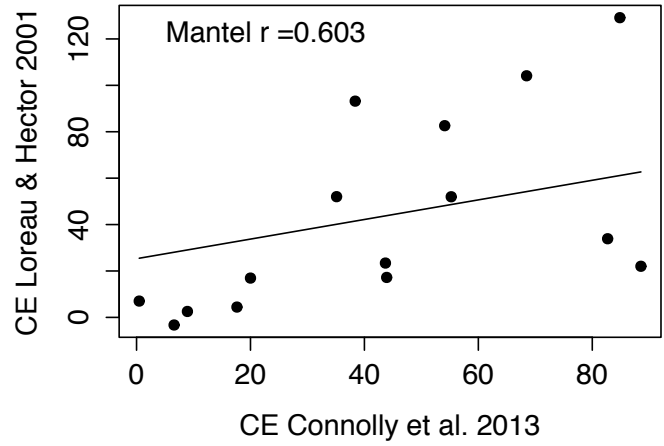

**Biomass Drought  
Selection effects**

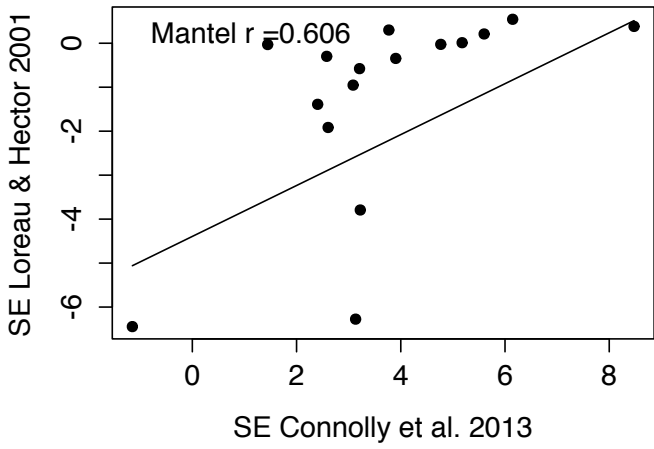

**Biomass Drought  
Complementarity effects**

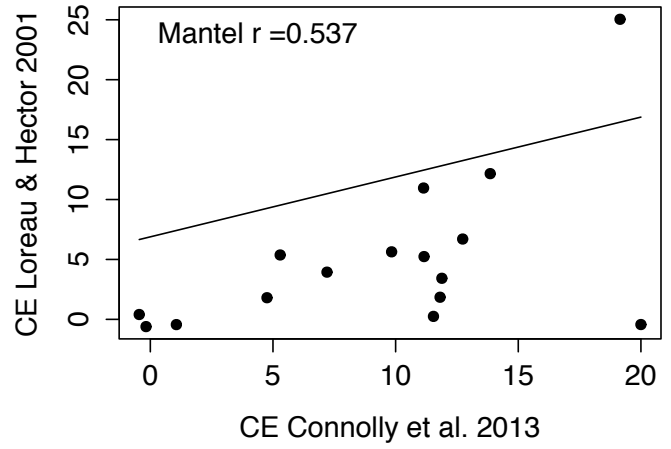

**Litter Control climate  
Selection effects**

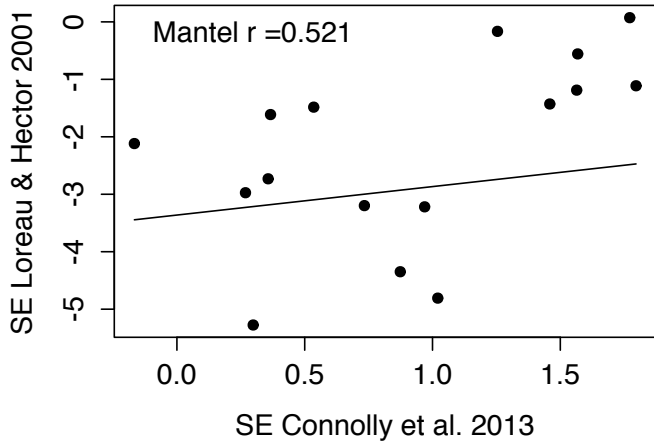

**Litter Control climate  
Complementarity effects**

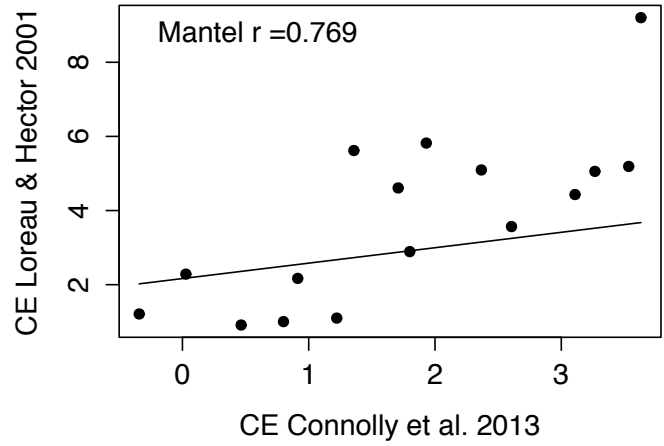

**Litter Drought  
Selection effects**

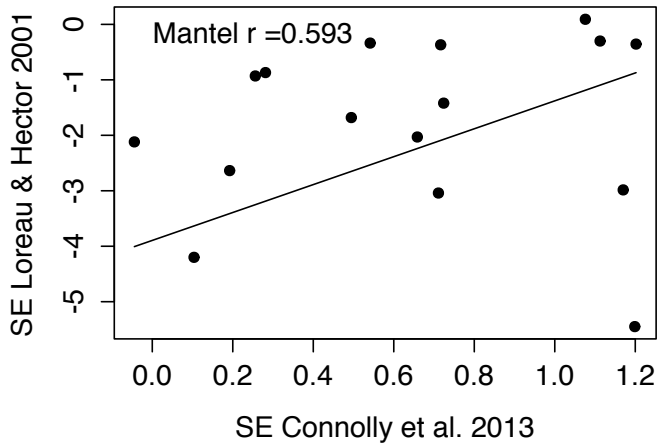

**Litter Drought  
Complementarity effects**

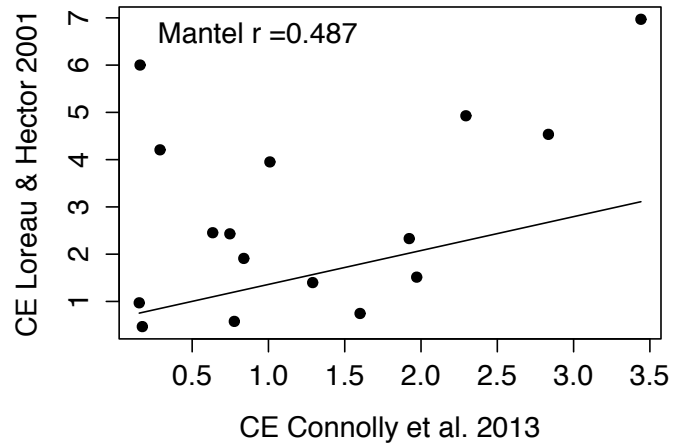

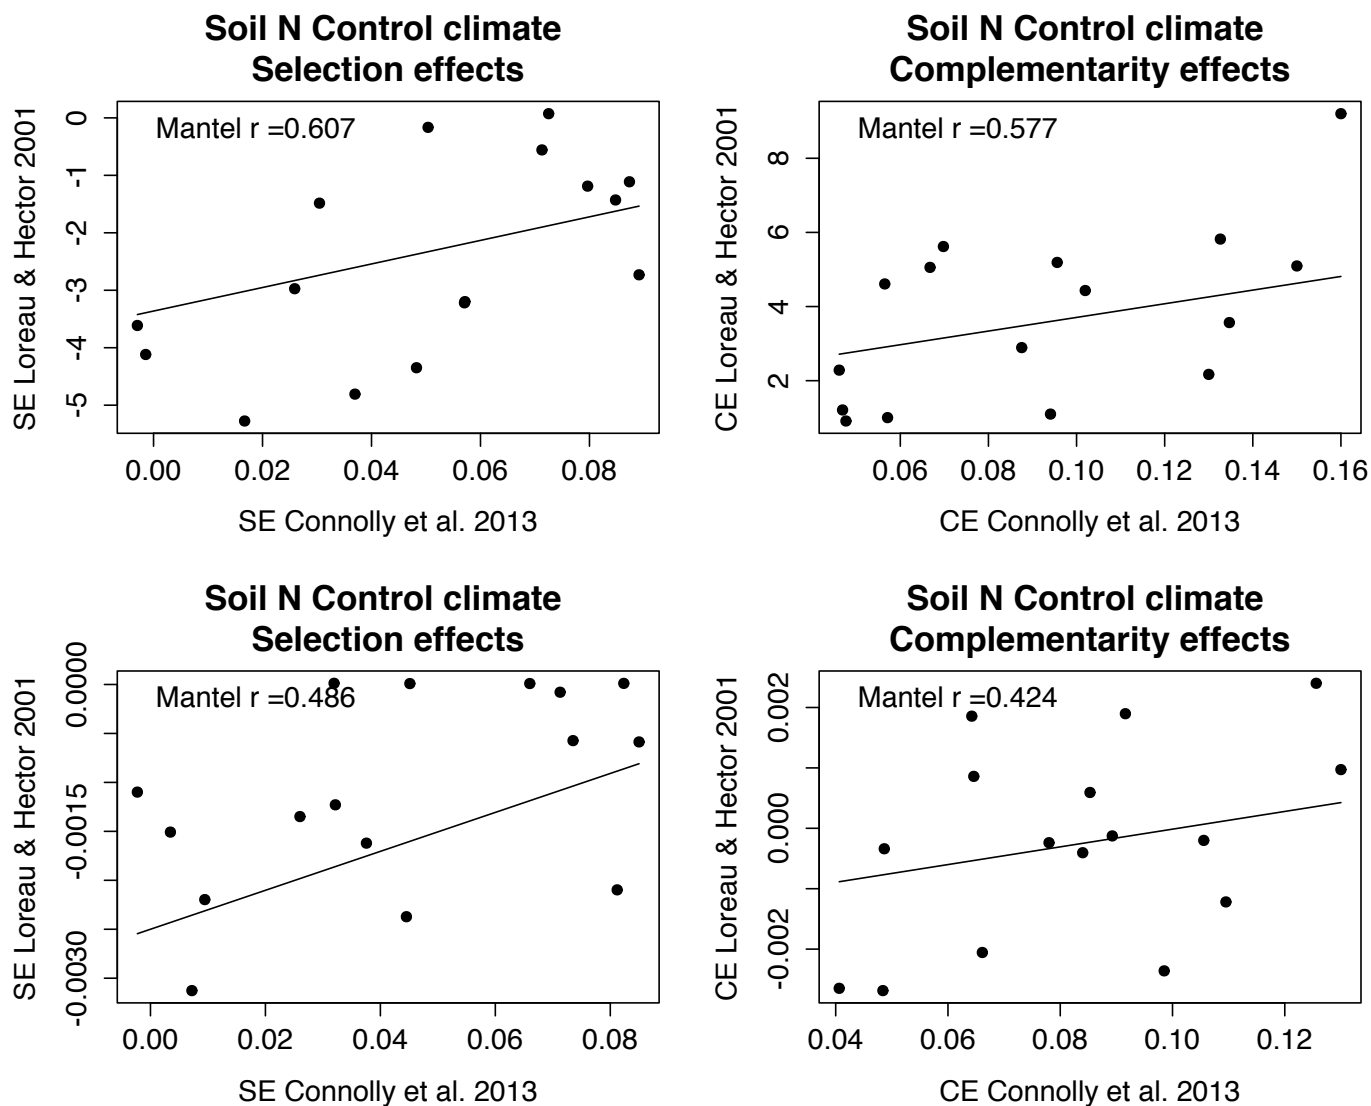

**Fig. S2** Correlation between complementarity effects and differences in species' selection effects obtained from additive partitioning (10) (y-axis) and from diversity interaction models (25) (x-axis). These graphs show that for the multiple functions (biomass, litter decomposition, soil nutrient content) evaluated in our experiment complementarity and selection effects correlated well between the two approaches under control climate (upper panels) and drought conditions (bottom panels). To obtain complementarity and selection effects at the community level using diversity interaction models (25), we sum all complementarity effects between the species in the community and all selection effects for the individual species.

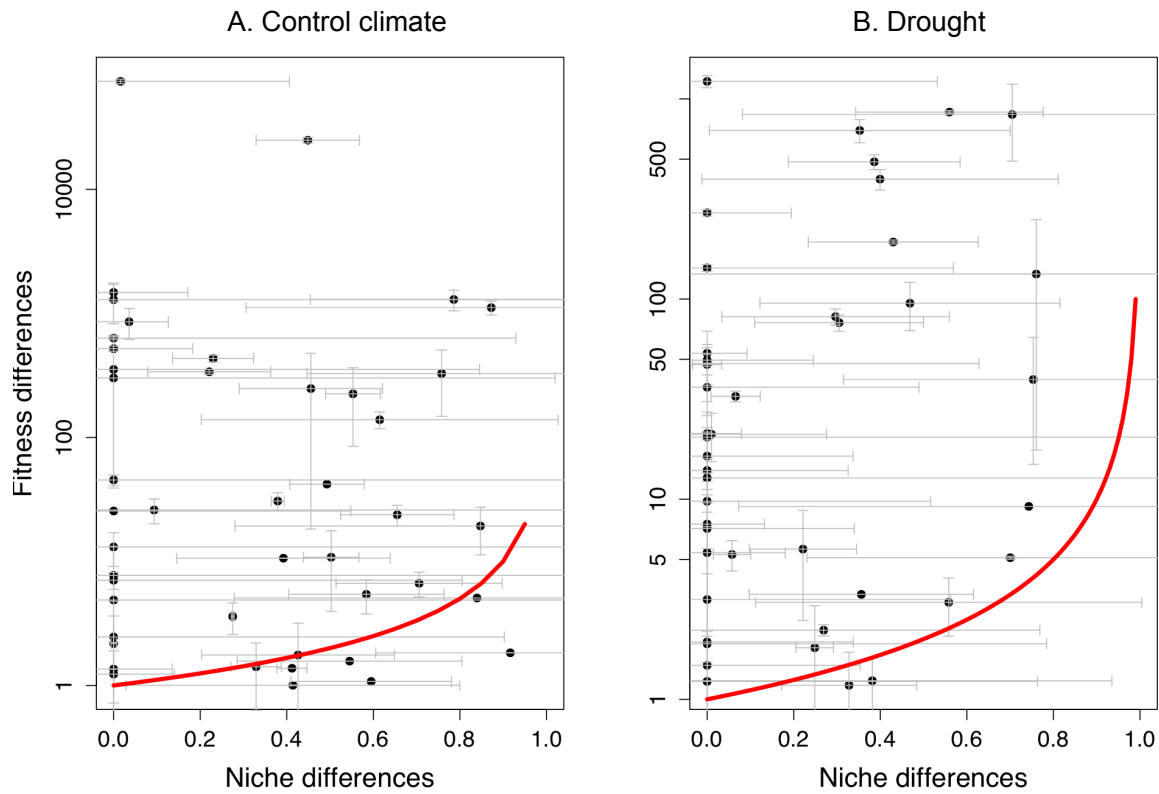

**Fig. S3** Relationship between pairwise niche and fitness differences for the two climate scenarios: (A) control climatic scenario for the study area where the first major rains after the drought period occurred in October, and (B) drought event where first major rains came in December, causing a 2-month delay in seed germination. Note that each point is a pair of species, and error bars are shown for niche and fitness differences. Also note, the differences in magnitude of the y-axis between climatic treatments. In fact, drought significantly reduced fitness differences and marginally reduced niche differences (paired t-test,  $t = 2.3564$ ,  $df = 44$ ,  $P = 0.0230$  and  $t = 1.7493$ ,  $df = 44$ ,  $P = 0.0872$ , respectively). The red solid line separates the region where the condition for coexistence is met ( $\rho < \kappa_j/\kappa_i$ ) from the competitive exclusion region. Six species pairs fall in the coexistence region under control climatic conditions and two under drought. For the rest of the species pairs, average fitness differences exceed stabilising niche differences. Note that our experiment focused on interactions at the neighbourhood spatial scale over a single generation and therefore does not capture the spatial and temporal heterogeneity that allows these pairs to coexist at the landscape scale.

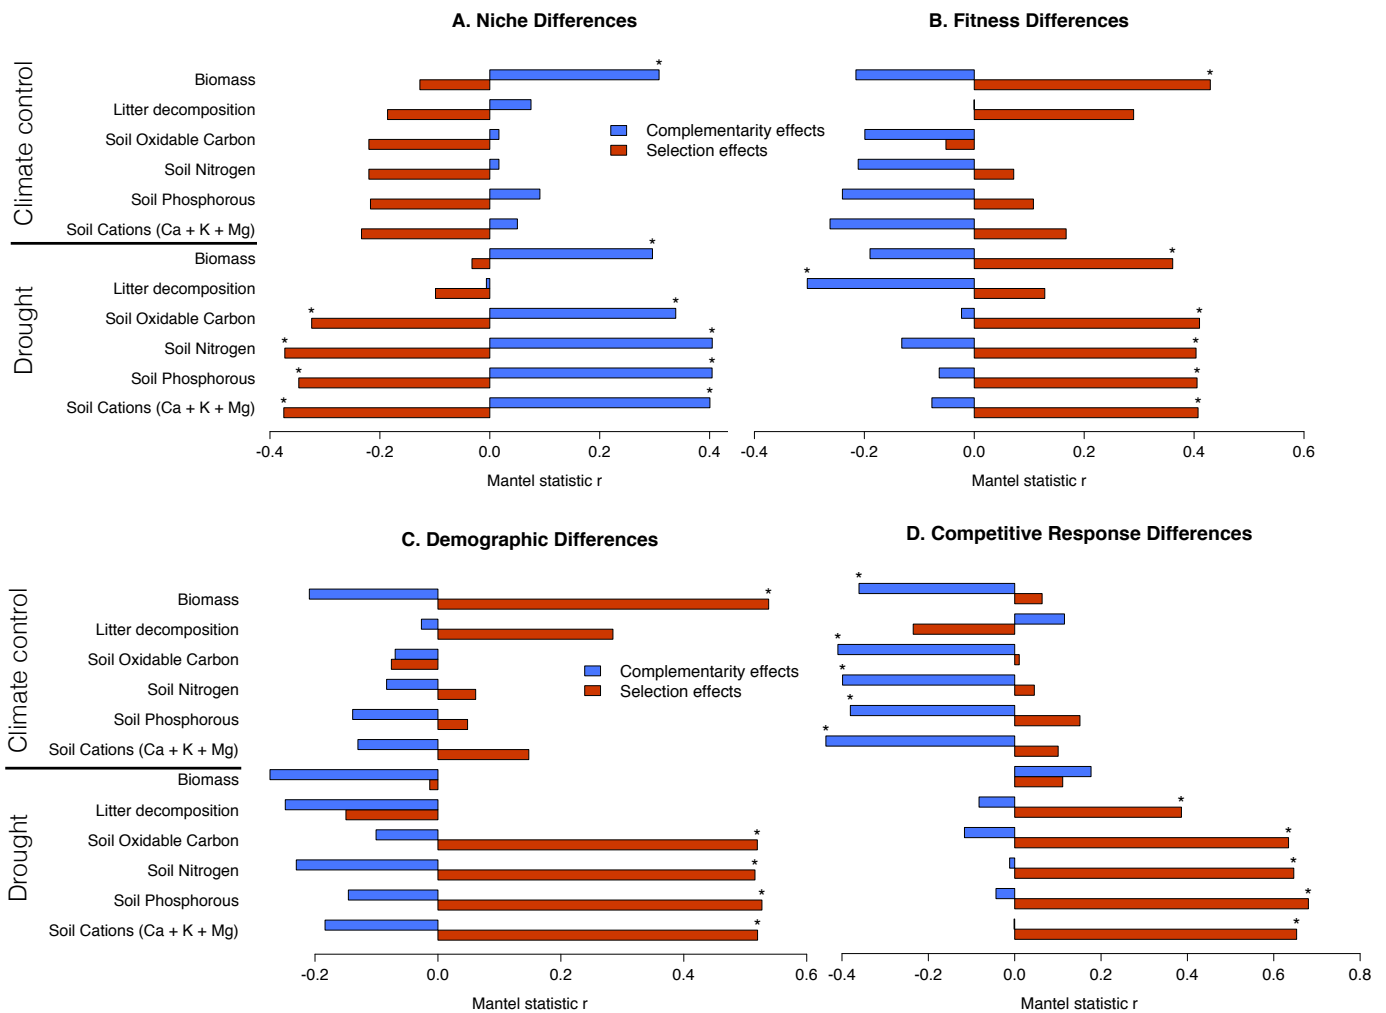

**Fig. S4.** Same as Figure 2 in the main text, this supplementary figure shows correlations between (A) stabilizing niche and (B) average fitness differences and complementarity (blue) and selection effects (red), here for all soil nutrients including soil oxidable C, soil P, and soil cations. Correlations between complementarity and selection are also shown with the two components of fitness differences, the demographic ratio (C) and the competitive response ratio (D). Soil oxidable C, soil P, and soil cations. Correlations are shown for the two climates (control and drought). Significant correlations, following Benjamini-Hochberg correction for multiple comparisons, are marked with an asterisk.

### A. Control climate

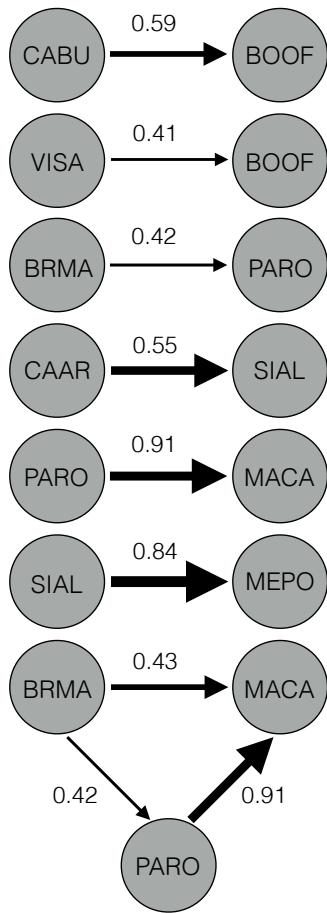

### B. Drought

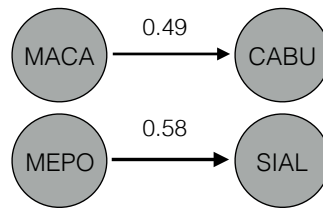

Fitness differences

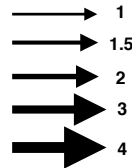

**Fig. S5** Illustration of the 6 species pairs and one triplet that produced a feasible and stable equilibrium under control climatic conditions (A), and the 2 species pairs with the same properties under drought (B). Note that none of the experimentally assembled communities in which we estimated the effect of species diversity on ecosystem functioning (see Table 1 for communities and species code) are predicted to stably coexist. Therefore, the biodiversity effects found in our experiment were transient rather than stable, which means that the degree of function is predicted to change with time as species are competitively excluded from communities, see Fig. S5. Black arrows denote the magnitude of fitness differences, and their direction indicates the best competitor within species pairs or triplets. Pairwise niche differences (between 0 and 1) are provided numerically for each species pair.
